# Supplementary material for: A Novel lncRNA SAAL Suppresses IAV Replication by Promoting Innate Responses
Source: MDPI journal article supplement (doi:10.3390/microorganisms10122336), 2022-11-25
Supplement: s1 [file s1]

**Table S1.** Primers used in qRT-PCR.

| Primer            | Sequence (5' → 3')      | Targeting genes |
|-------------------|-------------------------|-----------------|
| TCONS_00218279-F  | AAAATGTTGTCTTCTCCCAT    | TCONS_00218279  |
| TCONS_00218279-R  | TCTGTGAGGTTGAACTTGAGA   |                 |
| TCONS_00237522-F  | ATGTGCTAATATGTACAATGA   | TCONS_00237522  |
| TCONS_00237522-R  | GACCAAAATATAAACAGAGAA   |                 |
| TCONS_00296065-F  | CTTCTTCAGATAGGTTACTTG   | TCONS_00296065  |
| TCONS_00296065-R  | AAATTTGAAACCAAGAAGAAA   |                 |
| TCONS_00404240-F  | AGCTATTGATTGCCTCATCCT   | TCONS_00404240  |
| TCONS_00404240-R  | ATGTCATGTACCCTAGTGTCT   |                 |
| TCONS_00748040-F  | CCAGAAGGATAGCTTAGTGAG   | TCONS_00748040  |
| TCONS_00748040-R  | TGGGACACGTGGAAGTCAGAG   |                 |
| TCONS_00778347-F  | AGGTAATGAATGAGATAGGA    | TCONS_00778347  |
| TCONS_00778347-R  | TACAAGTAAAGCCTCCATAA    |                 |
| NONMMUT000378.2-F | GTTTTATCCAACATCCCT      | NONMMUT000378.2 |
| NONMMUT000378.2-R | AATAATGGGAATCAGTGAAC    |                 |
| NONMMUT058145.2-F | AGTCTTCCACTAGCAGCCTT    | NONMMUT058145.2 |
| NONMMUT058145.2-R | TGGCTTACAGGTTTACAGAGGT  |                 |
| TCONS_00651694-F  | TGATGCCATAAAGTGCTTGT    | TCONS_00651694  |
| TCONS_00651694-R  | CTTTACTTTGGGGTCTCTGT    |                 |
| TCONS_00974383-F  | CCAAACTCATTCTCTGACTC    | TCONS_00974383  |
| TCONS_00974383-R  | TTCCAGGATTCAATTTGAGT    |                 |
| TCONS_00424733-F  | CAAGTCCCTACCTCCTCCCT    | TCONS_00424733  |
| TCONS_00424733-R  | AAGAAGCCCCATACAGAATA    |                 |
| NONMMUT121027.1-F | ATATTAGCTATCTATCGGAT    | NONMMUT121027.1 |
| NONMMUT121027.1-R | GATCAATGGCTTATGCTCTA    |                 |
| NONMMUT074110.2-F | GGGTTTGGATGAATACAGAT    | NONMMUT074110.2 |
| NONMMUT074110.2-R | CAATGACCTTGTTCTTAACT    |                 |
| NONMMUT145028.1-F | CACTCGTAAACCACAGATCT    | NONMMUT145028.1 |
| NONMMUT145028.1-R | TATCAACAAAACCCATAACA    |                 |
| NONMMUT111155.1-F | GCTGGCATTGTGTCTCTCTT    | NONMMUT111155.1 |
| NONMMUT111155.1-R | ATCAAGTAACATATAAAGGC    |                 |
| TCONS_00373113-F  | TGATGTAGCACTTGATTTAA    | TCONS_00373113  |
| TCONS_00373113-R  | CATCTTACAAATGAGAAATT    |                 |
| TCONS_00938890-F  | TAACCTCTGATCTCAAGAAC    | TCONS_00938890  |
| TCONS_00938890-R  | CAAGAATGTGTTAGAGCCAA    |                 |
| NONMMUT032524.2-F | GAAAACGAATGAGGGTTAGAAGT | NONMMUT032524.2 |
| NONMMUT032524.2-R | GGCGGAGATCCCTCTGTACTTTG |                 |
| NONMMUT061473.2-F | ATGCAACGGTACCAAAGAAGCTC | NONMMUT061473.2 |
| NONMMUT061473.2-R | ATCCGGAGTTGAACACATTCCTT |                 |
| NONMMUT127241.1-F | TGAGTGTAGCTGGATAGACAAGA | NONMMUT127241.1 |
| NONMMUT127241.1-R | CAAATTCATTACAGAGTGCTGA  |                 |
